# Supplementary material
Source: PubMed Central journal article supplement (PMC3104086)
Supplement: NIHMS254071-supplement-01.pdf [file NIHMS254071-supplement-01.pdf]

## **Supplementary Materials:**

### **Characterization of Nanoparticles**

In this study, DNPs had mean diameters above 120 nm and were too large to be taken up by the cell membrane passively, according to existing literature [1]. The antibody conjugation onto DOX loaded nanoparticles caused a notable increase in its particle size. This observation is consistent with literature [2]. Thus, it is likely that the nanoparticles (DNPs and ADNPs) are taken up through endocytosis, and a similar study showed that particles smaller than 200 nm are generally endocytosed by clathrin-coated pits [3] which exhibit a slow rate of cell processing [4].

### **Cell Proliferation Data Analysis**

The following formulas were used to calculate net growth:

(1)  $(T_x - T_o)/(C - T_o) * 100$  if  $T_x > T_o$ , and

(2)  $(T_x - T_o)/T_o * 100$  if  $T_x < T_o$ .

$T_o$  is defined as the initial amount of cells.  $T_x$  corresponds to the absorbance of wells with different treatments, and  $C$  is the absorbance of the control wells. Net growth was plotted against DOX NPs concentration to show toxicity effects as described by Monks et al [5]. If  $T_x > T_o$ , the treatment is considered as growth inhibition; if  $T_x < T_o$ , there is no net growth after the treatment, and so its effect is considered as cell killing.

## Cytotoxicity Data for Void PLGA NPs

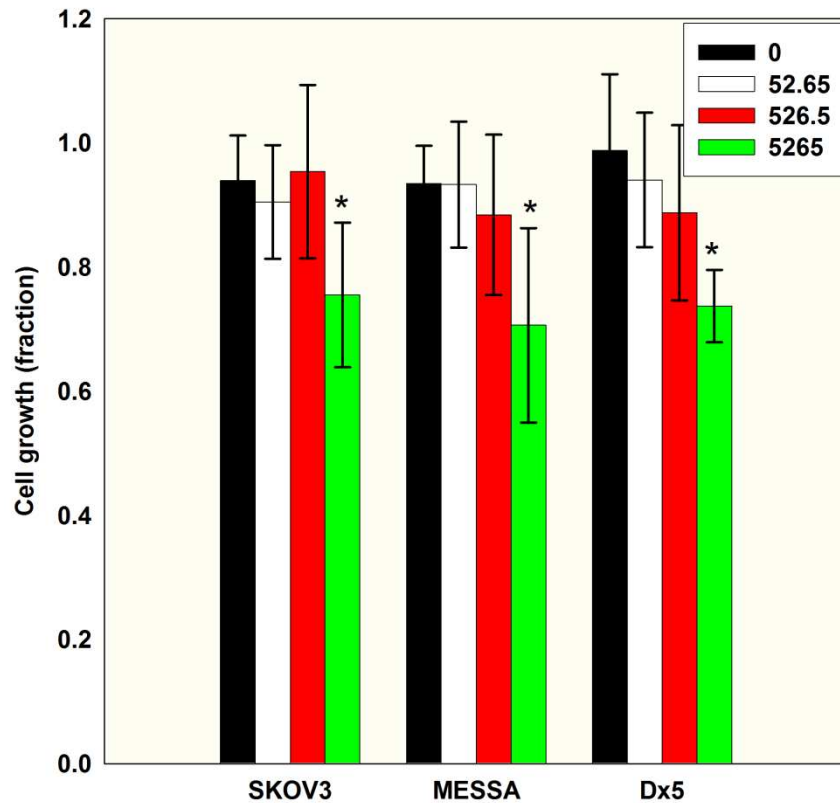

Figure 1. "Cell Growth vs. PLGA NPs concentration",  $n = 4$  experiments, 4 wells per treatment. \* $P < 0.05$  (by paired t-test) between samples and control, indicating significant difference due to high concentration of nanoparticles. The unit of PLGA NPs concentration is  $\mu\text{g/ml}$ .

### References:

1. Scott, C. J., W. M. Marouf, et al. (2008). "Immunocolloidal targeting of the endocytotic siglec-7 receptor using peripheral attachment of siglec-7 antibodies to poly(lactide-co-glycolide) nanoparticles." *Pharmaceutical Research* 25(1): 135-146.

2. Sun B, Ranganathan B, Feng SS. Multifunctional poly(D,L-lactide-co-glycolide)/montmorillonite (PLGA/MMT) nanoparticles decorated by Trastuzumab for targeted chemotherapy of breast cancer. *Biomaterials* 2008; 29(4): 475-486.
  
3. Rejman, J., V. Oberle, et al. (2004). "Size-dependent internalization of particles via the pathways of clathrin-and caveolae-mediated endocytosis." *Biochemical Journal* 377: 159-169.
  
4. Zuhorn IS, Kalicharan R, Hoekstra D. Lipoplex-mediated transfection of mammalian cells occurs through the cholesterol-dependent clathrin-mediated pathway of endocytosis. *J Biol Chem* 2002; 277(20): 18021-18028.
  
5. Monks, A., D. Scudiero, et al. (1991). "Feasibility of a High-Flux Anticancer Drug Screen Using a Diverse Panel of Cultured Human Tumor-Cell Lines." *Journal of the National Cancer Institute* 83(11): 757-766.

**List of Abbreviations and Abbreviated Terms:**

Bicinchonic acid (BCA)

Doxorubicin (DOX)

DOX-loaded NPs (DNPs)

Dimethylsulfoxide (DMSO)

Dichloromethane (DCM)

Dynamic light scattering (DLS)

DOX and ICG loaded PLGA NPs (ICG-DOX-PLGANPs)

Fetal bovine serum (FBS)

Human ovarian cancer cell lines (SKOV-3)

Human uterine drug resistant cell line (MES-SA/Dx5)

Human Epidermal Growth Factor Receptor 2 (HER-2)

Human uterine drug sensitive cell line (MES-SA)

HER-2 antibody conjugated DOX-loaded NPs (ADNPs)

Indocyanine Green (ICG)

MES-SA/Dx5 (Dx5)

Multi-drug resistance (MDR)

Molecular Weight (MW)

Nanoparticles (NPs)

N-(3-Dimethylaminopropyl)-N'-ethylcarbodiimide hydrochloride (EDC)

N-Hydroxy succinimide (NHS)

Poly (D, L- lactide co-glycolide) (PLGA)

P-glycoprotein (P-gp)

Phosphate Buffered Saline (PBS)

Polyvinyl alcohol (PVA)

Photomultiplier tube (PMT)

Sodium dodecyl sulphate (SDS)

Sodium Hydroxide (NaOH)
